# Supplementary material for: Lithiumtherapie bei älteren Patienten mit bipolarer Erkrankung
Source: Springer Nature journal article supplement (doi:10.1007/s00739-018-0456-4), 2018-03-13
Supplement: MOESM1 [file 15531572]

**Literatur**

- Al Jurdi RK, Marangell LB, Petersen NJ, Martinez M, Gyulai L, Sajatovic M. Prescription patterns of psychotropic medications in elderly compared with younger participants who achieved a "recovered" status in the systematic treatment enhancement program for bipolar disorder. Am J Geriatr Psychiatry 2008;16(11):922-933.
- Baldessarini RJ, Leahy L, Arcona S, Gause D, Zhang W, Hennen J. Patterns of psychotropic drug prescription for U.S. patients with diagnoses of bipolar disorders. Psychiatr Serv 2007;58(1):85–91.
- Bersani G, Quartini A, Zullo D, Iannitelli A. [Potential neuroprotective effect of lithium in bipolar patients evaluated by neuropsychological assessment: preliminary results.](https://www.ncbi.nlm.nih.gov/pubmed/26563456)

Hum Psychopharmacol. 2016;31(1):19-28.

- Bushey M, Rathey U, Bowers MB Jr. Lithium treatment in a very elderly nursing home population. Compr Psychiatry. 1983;24(4):392-396.
- Chen KP, Shen WW, Lu ML. Implication of serum concentration monitoring in patients with lithium intoxication. Psychiatry Clin Neurosci. 2004;58(1):25-29.
- Cook BL, Smith RE, Perry PJ, Calloway RA. Theophylline-lithium interaction. J Clin Psychiatry. 1985;46(7):278-279.
- Dennison U, Clarkson M, O’Mullane J, Cassidy EM. The incidence and clinical correlates of lithium toxicity: a retrospective review. Ir J Med Sci. 2011;180(3):661-665.
- Dols A, Kessing LV, Strejilevich SA, Rej S, Tsai SY, Gildengers AG, Almeida OP, Shulman KI, Sajatovic M; International Society for Bipolar Disorders Task Force for Older Adults with Bipolar Disorder. Do current national and international guidelines have specific recommendations for older adults with bipolar disorder? A brief report. Int J Geriatr Psychiatry. 2016;31(12):1295-1300.
- Eastham JH, Jeste DV, Young RC. Assessment and treatment of bipolar disorder in the elderly. Drugs Aging 1998; 12(3): 205-224.
- [Forlenza OV](https://www.ncbi.nlm.nih.gov/pubmed/?term=Forlenza%20OV%5BAuthor%5D&cauthor=true&cauthor_uid=21525519), [Diniz BS](https://www.ncbi.nlm.nih.gov/pubmed/?term=Diniz%20BS%5BAuthor%5D&cauthor=true&cauthor_uid=21525519), [Radanovic M](https://www.ncbi.nlm.nih.gov/pubmed/?term=Radanovic%20M%5BAuthor%5D&cauthor=true&cauthor_uid=21525519), [Santos FS](https://www.ncbi.nlm.nih.gov/pubmed/?term=Santos%20FS%5BAuthor%5D&cauthor=true&cauthor_uid=21525519), [Talib LL](https://www.ncbi.nlm.nih.gov/pubmed/?term=Talib%20LL%5BAuthor%5D&cauthor=true&cauthor_uid=21525519), [Gattaz WF](https://www.ncbi.nlm.nih.gov/pubmed/?term=Gattaz%20WF%5BAuthor%5D&cauthor=true&cauthor_uid=21525519). Disease-modifying properties of long-term lithium treatment for amnestic mild cognitive impairment: randomised controlled trial. [Br J Psychiatry.](https://www.ncbi.nlm.nih.gov/pubmed/?term=Forlenza+et+al.+Br+J+Psychiatry+2011) 2011;198(5):351-356.
- Gerhard T, Devanand DP, Huang C, Crystal S, Olfson M. Lithium treatment and risk for dementia in adults with bipolar disorder: population-based cohort study. Br J Psychiatry. 2015;207(1):46-51.
- Goodwin GM, Haddad PM, Ferrier IN, Aronson JK, Barnes T, Cipriani A, Coghill DR, Fazel S, Geddes JR, Grunze H, Holmes EA, Howes O, Hudson S, Hunt N, Jones I, Macmillan IC, McAllister-Williams H, Miklowitz DR, Morriss R, Munafò M, Paton C, Saharkian BJ, Saunders K, Sinclair J, Taylor D, Vieta E, Young AH. Evidence-based guidelines for treating bipolar disorder: Revised third edition recommendations from the British Association for Psychopharmacology. J Psychopharmacol. 2016;30(6):495-553.
- Grandjean EM, Aubry JM. Lithium: updated human knowledge using an evidence-based approach. part II: Clinical pharmacology and therapeutic monitoring. CNS Drugs. 2009;23(4):331-349.
- Grandjean EM, Aubry JM. Lithium: updated human knowledge using an evidence-based approach: part III: clinical safety. CNS Drugs. 2009;23(5):397-418.
- Greil W, Stoltzenburg MC, Mairhofer ML, Haag M. Lithium dosage in the elderly. A study with matched age groups. J Affect Disord. 1985;9: 1-4.
- Grunze H, Vieta E, Goodwin GM, Bowden C, Licht RW, Möller HJ, Kasper S; WFSBP Task Force on Treatment Guidelines for Bipolar Disorders 2013. The World Federation of Societies of Biological Psychiatry (WFSBP) guidelines for the biological treatment of bipolar disorders: update 2012 on the long-term treatment of bipolar disorder. World J Biol Psychiatry 2013;14:154–219.
- Head L, Dening T. Lithium in the over-65s: who is taking it and who is monitoring it? A survey of older adults on lithium in the Cambridge mental health services catchment area. Int J Geriatr Psychiatry. 1998;13(3):164-171.
- Himmelhoch JM, Forrest J, Neil JF, Detre TP. Thiazide-lithium synergy in refractory mood swings. Am J Psychiatry. 1977;134(2):149-152.
- Juurlink DN, Mamdani MM, Kopp A, Rochon PA, Shulman KI, Redelmeier DA. Drug-induced lithium toxicity in the elderly: a population-based study. J Am Geriatr Soc. 2004;52(5):794-798.
- Kallner G, Lindelius R, Petterson U, Stockman O, Tham A. Mortality in 497 patients with affective disorders attending a lithium clinic or after having left it. Pharmacopsychiatry. 2000;33(1):8-13.
- Kessing LV, Søndergård L, Kvist K, Andersen PK. Suicide risk in patients treated with lithium. Arch Gen Psychiatry. 2005 ;62(8):860-866.
- [Kessing LV](https://www.ncbi.nlm.nih.gov/pubmed/?term=Kessing%20LV%5BAuthor%5D&cauthor=true&cauthor_uid=20148870), [Forman JL](https://www.ncbi.nlm.nih.gov/pubmed/?term=Forman%20JL%5BAuthor%5D&cauthor=true&cauthor_uid=20148870), [Andersen PK](https://www.ncbi.nlm.nih.gov/pubmed/?term=Andersen%20PK%5BAuthor%5D&cauthor=true&cauthor_uid=20148870). Does lithium protect against dementia? [Bipolar Disord.](https://www.ncbi.nlm.nih.gov/pubmed/?term=Kessing+et+al.+Bipolar+Disord+2010%3B) 2010;12(1):87-94.
- Kristoff CA, Hayes PE, Barr WH, Small RE, Townsend RJ, Ettigi PG. [Effect of ibuprofen on lithium plasma and red blood cell concentrations.](https://www.ncbi.nlm.nih.gov/pubmed/3948485)Clin Pharm. 1986;5(1):51-5.
- Mukhopadhyay D, Gokulkrishnan L, Mohanaruban K. Lithiuminduced nephrogenic diabetes insipidus in older people. Age Ageing. 2001;30(4):347-350.
- Murray N, Hopwood S, Balfour DJ, Ogston S, Hewick DS. The influence of age on lithium efficacy and side-effects in out-patients. Psychol Med. 1983;13(1):53-60.
- NICE: National Institute for Clinical Excellence. Bipolar disorder: The Management of Bipolar Disorder in Adults, Children and Adolescents, in Primary and Secondary Care. Clinical Guideline 38. London: The British Psychological Society, 2006.
- [Nunes MA](https://www.ncbi.nlm.nih.gov/pubmed/?term=Nunes%20MA%5BAuthor%5D&cauthor=true&cauthor_uid=22746245), [Viel TA](https://www.ncbi.nlm.nih.gov/pubmed/?term=Viel%20TA%5BAuthor%5D&cauthor=true&cauthor_uid=22746245), [Buck HS](https://www.ncbi.nlm.nih.gov/pubmed/?term=Buck%20HS%5BAuthor%5D&cauthor=true&cauthor_uid=22746245). Microdose lithium treatment stabilized cognitive impairment in patients with Alzheimer's disease. [Curr Alzheimer Res.](https://www.ncbi.nlm.nih.gov/pubmed/?term=Nunes+AND+Curr+Alzheimer+Res+2013) 2013;10(1):104-107.
- Oakley PW, Whyte IM, Carter GL. Lithium toxicity: an iatrogenic problem in susceptible individuals. Aust N Z J Psychiatry. 2001;35(6):833–840.
- [Oruch R](https://preview.ncbi.nlm.nih.gov/pubmed/?term=Oruch%20R%5BAuthor%5D&cauthor=true&cauthor_uid=24991789), Elderbi MA, Khattab HA, Pryme IF, Lund A. Lithium: a review of pharmacology, clinical uses, and toxicity. Eur J Pharmacol. 2014;740:464-473.
- [Paterson A](https://www.ncbi.nlm.nih.gov/pubmed/?term=Paterson%20A%5BAuthor%5D&cauthor=true&cauthor_uid=27741027), [Parker G](https://www.ncbi.nlm.nih.gov/pubmed/?term=Parker%20G%5BAuthor%5D&cauthor=true&cauthor_uid=27741027). Lithium and cognition in those with bipolar disorder. Int Clin Psychopharmacol. 2017;32(2):57-62.
- Permoda-Osip A, Abramowicz M, Kraszewska A, Suwalska A, Chlopocka-Wozniak M, Rybakowski JK. Kidney, thyroid and other organ functions after 40 years or more of lithium therapy: a case series of five patients. Ther Adv Psychopharmacol. 2016;6(4):277-282.
- Poggio ED, Rule AD, Tanchanco R, Arrigain S, Butler RS, Srinivas T, Stephany BR, Meyer KH, Nurko S, Fatica RA, Shoskes DA, Krishnamurthi V, Goldfarb DA, Gill I, Schreiber MJ Jr. Demographic and clinical characteristics associated with glomerular filtration rates in living kidney donors. Kidney Int. 2009;75(10):1079-1087.
- [Quartini A](https://www.ncbi.nlm.nih.gov/pubmed/?term=Quartini%20A%5BAuthor%5D&cauthor=true&cauthor_uid=27651765), [Iannitelli A](https://www.ncbi.nlm.nih.gov/pubmed/?term=Iannitelli%20A%5BAuthor%5D&cauthor=true&cauthor_uid=27651765), [Bersani G](https://www.ncbi.nlm.nih.gov/pubmed/?term=Bersani%20G%5BAuthor%5D&cauthor=true&cauthor_uid=27651765). Lithium: from mood stabilizer to putative cognitive enhancer. [Neural Regen Res.](https://www.ncbi.nlm.nih.gov/pubmed/?term=Quartini+et+al.+Neural+Regen+Res+2016) 2016;11(8):1234-1235.
- Reimann IW, Diener U, Frolich JC. Indomethacin but not aspirin increases plasma lithium ion levels. Arch Gen Psychiatry. 1983;40(3):283-286.
- Rej S, Shulman K, Herrmann N, Harel Z, Fischer HD, Fung K, Gruneir A. Prevalence and correlates of renal disease in older lithium users: a population-based study. Am J Geriatr Psychiatry. 2014;22(11):1075-1082.
- Rej S, Beaulieu S, Segal M, Low NC, Mucsi I, Holcroft C, Shulman K, Looper KJ. Lithium dosing and serum concentrations across the age spectrum: from early adulthood to the tenth decade of life. Drugs Aging. 2014;31(12):911-916.
- Rej S, Shulman K, Herrmann N, Harel Z, Fischer HD, Fung K, et al. Prevalence and correlates of renal disease in older lithium users: a population-based study. Am J Geriatr Psychiatry. 2014;22(11):1075–1082.
- [Sabater A](https://www.ncbi.nlm.nih.gov/pubmed/?term=Sabater%20A%5BAuthor%5D&cauthor=true&cauthor_uid=26480209), [García-Blanco AC](https://www.ncbi.nlm.nih.gov/pubmed/?term=Garc%C3%ADa-Blanco%20AC%5BAuthor%5D&cauthor=true&cauthor_uid=26480209), [Verdet HM](https://www.ncbi.nlm.nih.gov/pubmed/?term=Verdet%20HM%5BAuthor%5D&cauthor=true&cauthor_uid=26480209), [Sierra P](https://www.ncbi.nlm.nih.gov/pubmed/?term=Sierra%20P%5BAuthor%5D&cauthor=true&cauthor_uid=26480209), [Ribes J](https://www.ncbi.nlm.nih.gov/pubmed/?term=Ribes%20J%5BAuthor%5D&cauthor=true&cauthor_uid=26480209), [Villar I](https://www.ncbi.nlm.nih.gov/pubmed/?term=Villar%20I%5BAuthor%5D&cauthor=true&cauthor_uid=26480209), [Lara MJ](https://www.ncbi.nlm.nih.gov/pubmed/?term=Lara%20MJ%5BAuthor%5D&cauthor=true&cauthor_uid=26480209), [Arnal P](https://www.ncbi.nlm.nih.gov/pubmed/?term=Arnal%20P%5BAuthor%5D&cauthor=true&cauthor_uid=26480209), [Rojo L](https://www.ncbi.nlm.nih.gov/pubmed/?term=Rojo%20L%5BAuthor%5D&cauthor=true&cauthor_uid=26480209), [Livianos L](https://www.ncbi.nlm.nih.gov/pubmed/?term=Livianos%20L%5BAuthor%5D&cauthor=true&cauthor_uid=26480209). Comparative neurocognitive effects of lithium and anticonvulsants in long-term stable bipolar patients. [J Affect Disord.](https://www.ncbi.nlm.nih.gov/pubmed/26480209) 2016;190:34-40.
- Sajatovic M, Strejilevich SA, Gildengers AG, Dols A, Al Jurdi RK, Forester BP, Kessing LV, Beyer J, Manes F, Rej S, Rosa AR, Schouws SN, Tsai SY, Young RC, Shulman KI. A report on older-age bipolar disorder from the International Society for Bipolar Disorders Task Force. Bipolar Disord. 2015;17(7):689-704.
- Sheehy CM, Perry PA, Cromwell SL. Dehydration: biological considerations, age-related changes, and risk factors in older adults. Biol Res Nurs. 1999;1(1):30-37.
- Shulman KI, Mackenzie S, Hardy B. The clinical use of lithium carbonate in old age: a review. Prog Neuropsychopharmacol Biol Psychiatry. 1987;11:159-164.
- Shulman KI, Herrmann N. The nature and management of mania in old age. Psychiatr Clin North Am. 1999;22(3):649-665.
- Shulman KI, Rochon P, Sykora K, Anderson G, Mamdani M, Susan Bronskill S, Tran CCT. Changing prescription patterns for lithium and valproic acid in old age: shifting practice without evidence. BMJ 2003;326:960e961.
- Shulman KI, Sykora K, Gill S, Mamdani M, Bronskill S, Wodchis WP, Anderson G, Rochon P. Incidence of delirium in older adults newly prescribed lithium or valproate: a population-based cohort study. J Clin Psychiatry. 2005;66(4):424-427.
- Smigan L, Bucht G, von Knorring L, Perris C, Wahlin A. Long-term lithium treatment and renal functions. A prospective study. Neuropsychobiology. 1984;11(1):33–38.
- Smith RE, Helms PM. Adverse effects of lithium therapy in the acutely ill elderly patient. J Clin Psychiatry. 1982;43: 94-99.
- Sproule BA, Hardy BG, Shulman KI. Differential pharmacokinetics of lithium in elderly patients. Drugs Aging 2000;16 (3):165-177.
- Su YP, Chang CJ, Hwang TJ. Lithium intoxication after valsartan treatment. Psychiatry Clin Neurosci 2007 Apr; 61 (2): 204
- Tondo L; Abramowicz M, Alda M, Bauer M, Bocchetta A, Bolzani L, Calkin CV, Chillotti C, Hidalgo-Mazzei D, Manchia M, Müller-Oerlinghausen B, Murru A, Perugi G, Pinna M, Quaranta G, [Reginaldi D](https://www.ncbi.nlm.nih.gov/pubmed/?term=Reginaldi%20D%5BAuthor%5D&cauthor=true&cauthor_uid=28480485), Reif A, Ritter P Jr, Rybakowski JK, Saiger D, Sani G, Selle V, Stamm T, Vázquez GH, Veeh J, Vieta E, Baldessarini RJ. Long-term lithium treatment in bipolar disorder: effects on glomerular filtration rate and other metabolic parameters. Int J Bipolar Disord. 2017;5(1):27.
- Tyrer SP, Schacht RG, McCarthy MJ, Menard KN, Leong S, Shopsin B. The effect of lithium on renal haemodynamic function. Psychol Med. 1983;13(1):61-69.
- Vestergaard P, Amdisen A, Hansen HE, Schou M. Lithium treatment and kidney function. A survey of 237 patients in long-term treatment. Acta Psychiatr Scand. 1979;60(5):504–520.
- Vestergaard P, Amdisen A. Lithium treatment and kidney function. A follow-up study of 237 patients in long-term treatment. Acta Psychiatr Scand. 1981;63(4):333–345.
- Waring WS. Management of lithium toxicity. Toxicol Rev.2006;25(4):221-230.
- Weinstein JR, Anderson S. The aging kidney: physiological changes. Adv Chronic Kidney Dis. 2010;17(4):302-307.
- Wilkinson D, Holmes C, Woolford J, Stammers S, North J. Prophylactic therapy with lithium in elderly patients with unipolar major depression. Int J Geriatr Psychiatry. 2002;17(7):619-622.
